# Supplementary material
Source: MDPI journal article supplement (https://www.mdpi.com/2075-163X/14/5/505)
Supplement: s1 [file s1]

Supplementary Information for

# **Twinning Impact on the Structure and Hypotheses on the Growth Mechanism of Kermesite: Insights from Yunnan, China**

**Hong Yu<sup>1,2,\*</sup>, Denghong Wang<sup>1</sup>, Zeying Zhu<sup>1</sup>, Wenyan Li<sup>3</sup>, Dong Wang<sup>1</sup>, Zhenyu Chen<sup>1</sup>,**

**Yike Li<sup>1</sup>, Changhui Ke<sup>1</sup>,**

- <sup>1</sup> Ministry of Natural Resources (MNR) Key Laboratory of Metallogeny and Mineral Assessment, Institute of Mineral Resources, Chinese Academy of Geological Sciences (CAGS), Beijing 100037, China 1; Hong Yu (coime\_yh@hotmail.com), Denghong Wang (wangdenghong@vip.sina.com), Zeying Zhu (zhuzeying\_nju@163.com), Dong Wang (wdong14@126.com), Zhenyu Chen (czy7803@163.com), Yike Li (like430@cags.ac.cn), Changhui Ke (kechanghuicags@126.com)
- <sup>2</sup> China University of Geosciences (Beijing), Xueyuan Road 29, Beijing 100083, China 2; Hong Yu (coime\_yh@hotmail.com)
- <sup>3</sup> Key Laboratory for the Study of Focused Magmatism and Giant Ore Deposits, Ministry of Land and Resources, Xi'an Center of China Geological Survey, Xi'an 710054, P.R. China 3; Wenyan Li (xalwenyan@126.com)
- \* Correspondence: Hong Yu, coime\_yh@hotmail.com

**This file includes:**

**Figure S1-S2**

SAED indexing is generated using SingleCrystal software[1].

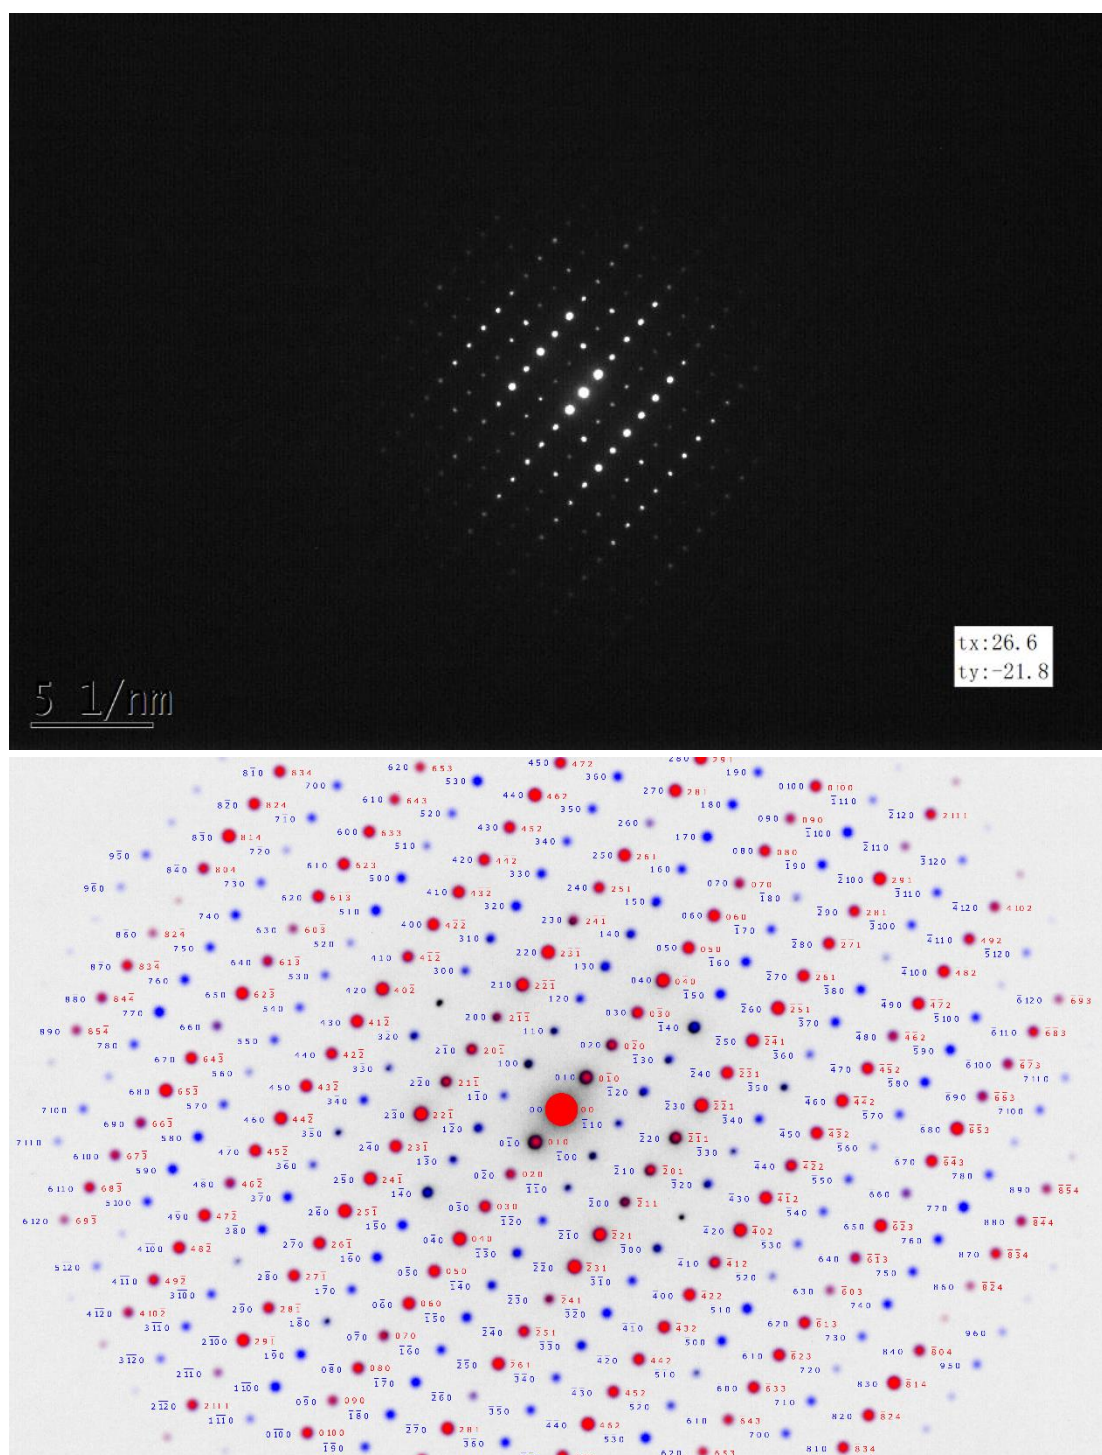

**Figure S1** SAED indexing corresponding to Figure 4g or Figure 5a(1). The blue spots represent the matrix, while the red spots represent the twins of kermesite.

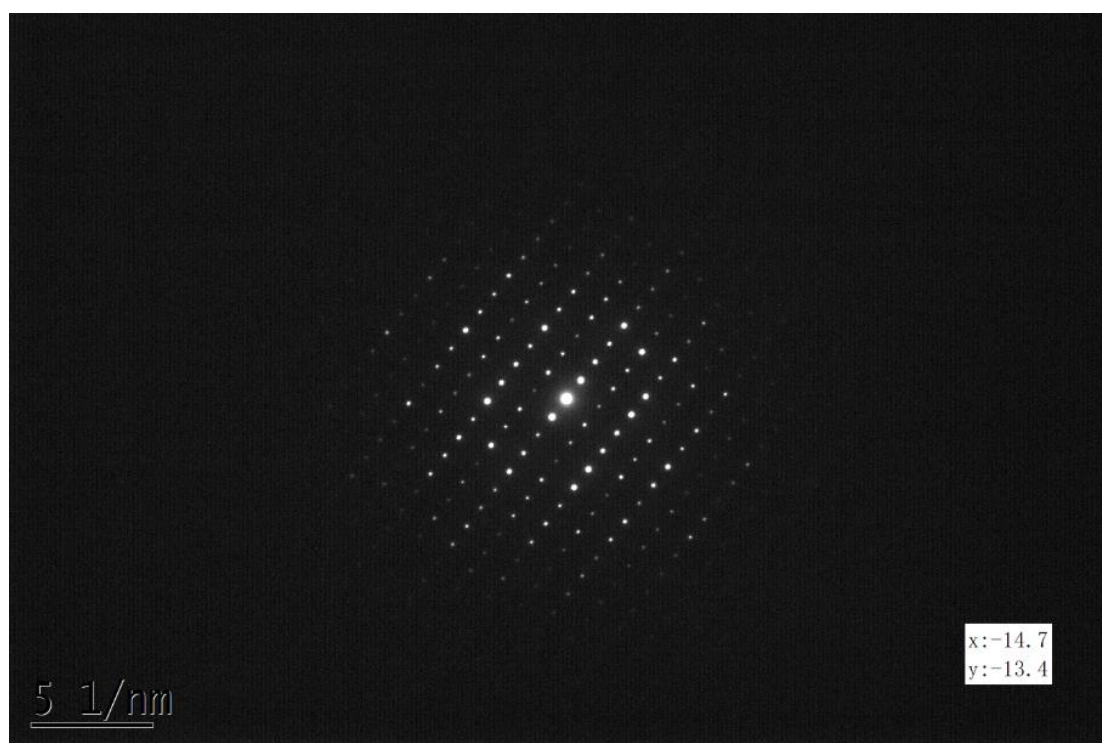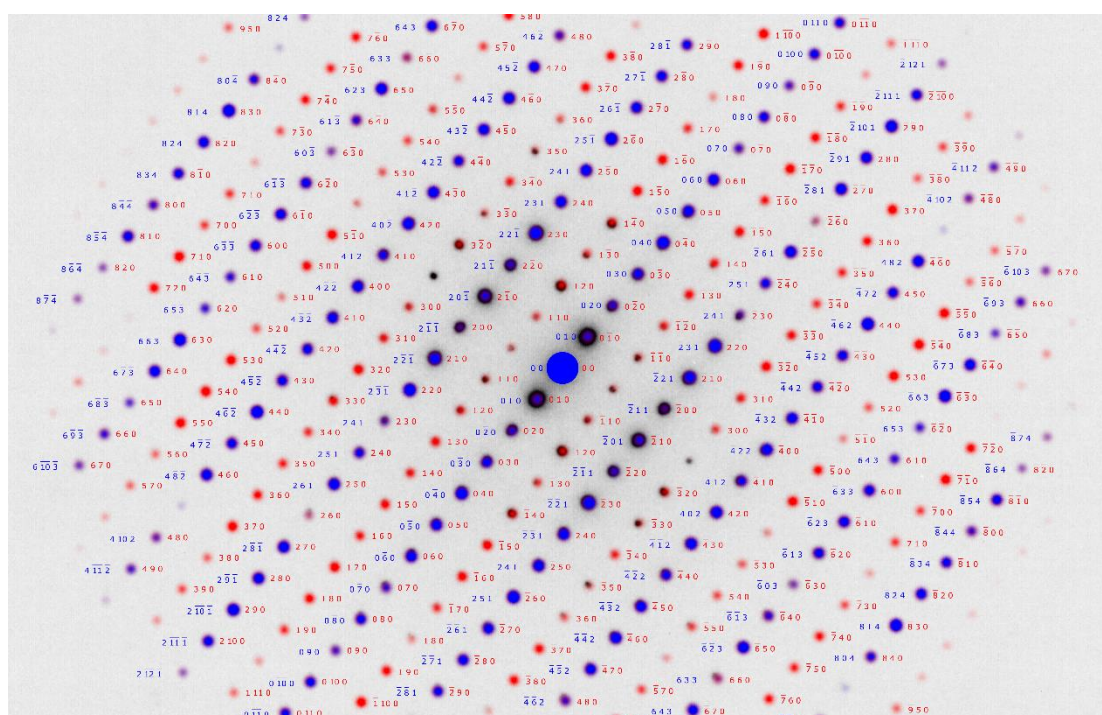

**Figure S2** SAED indexing corresponding to Figure 4h or Figure 5a(6). The blue spots represent the matrix, while the red spots represent the twins of kermesite.

**References:**

1. Palmer, D. SingleCrystal 4: real-time multi-phase diffraction simulation. *J Appl Crystallogr* **2020**, 53, 860, doi:10.1107/S1600576720006378.
